# Supplementary material for: Preventing Patient Falls Overnight Using Video Monitoring: A Clinical Evaluation
Source: MDPI journal article supplement (doi:10.3390/ijerph192113735), 2022-10-22
Supplement: s1 [file s1]

## Supplementary Material B: Portable Video Monitoring Staff Survey REDCAP Database Register

- 1) Date \_\_\_\_\_
- 2) Ward ☐ 1. 2H Sunshine Hosp  
☐ 2. 3B Footscray Hosp  
☐ 3. 2A Sunshine Hosp
- 3) UR \_\_\_\_\_
- 4) Falls Risk Category ☐ High Falls Risk  
☐ Moderate Falls Risk  
☐ Low Falls Risk
- 5) PVM Criteria ☐ HFR  
☐ Confused  
☐ Impulsive  
☐ NESB
- 6) Reason nurse attended patient due to PVM ☐ Toileting  
☐ Pain  
☐ Hunger / Thirst  
☐ Other
- 7) If selected Other, please document reason: \_\_\_\_\_
- 8) Number of times nurse responded to patient after alerted by PVM \_\_\_\_\_
- 9) Was PVM taken by nursing staff on patient rounds ☐ Yes  
☐ No
- 10) Did patient fall overnight ☐ Yes  
☐ No
- 11) If patient fall, Riskman number \_\_\_\_\_
- 12) Additional notes \_\_\_\_\_
