# Supplementary material for: Preventing Patient Falls Overnight Using Video Monitoring: A Clinical Evaluation
Source: MDPI journal article supplement (doi:10.3390/ijerph192113735), 2022-10-22
Supplement: s1 [file s1]

### Supplementary Material C: Riskman Incident Reporting System Database

- 1) Riskman Number \_\_\_\_\_
- 2) Ward ☐ 1. 2H Sunshine Hosp  
☐ 2. 3B Footscray Hosp  
☐ 3. 2A Sunshine Hosp
- 3) UR ID \_\_\_\_\_
- 4) Date \_\_\_\_\_
- 5) Time of fall \_\_\_\_\_
- 6) Type of fall ☐ Roll out of Lolo bed with crash mat insitu  
☐ Witnessed fall no headstrike  
☐ Witnessed fall – with headstrike  
☐ Unwitnessed fall
- 7) PVM Insitu ☐ Yes  
☐ No
- 8) Patient Falls Risk Category ☐ High  
☐ Moderate  
☐ Low
