# Supplementary material for: Preventing Patient Falls Overnight Using Video Monitoring: A Clinical Evaluation
Source: MDPI journal article supplement (doi:10.3390/ijerph192113735), 2022-10-22
Supplement: s1 [file s1]

## Supplementary Material E: Uniden Baby Monitor Costing

### Q-36110 - MH Baby Monitor

| Image<br>SKU                                                                                | Description                                                                                                                              | QTY | Sales<br>Price<br>Excl.<br>GST | Sales<br>Price<br>Incl.<br>GST | Subtotal<br>Sales Price<br>Incl. GST |
|---------------------------------------------------------------------------------------------|------------------------------------------------------------------------------------------------------------------------------------------|-----|--------------------------------|--------------------------------|--------------------------------------|
| <br>439248 | Uniden BW3102 4.3' Digital Wireless Baby Video Monitor with Two Cameras<br>colour<br><b>Manufacturer:</b> UNIDEN<br><b>Model:</b> BW3102 | 2   | \$ 213.48                      | \$ 234.83                      | \$ 469.66                            |
| <br>86499  | Customer Freight Charge<br><br><b>Manufacturer:</b> JB HI-FI<br><b>Model:</b> 86499                                                      | 1   | \$ 13.64                       | \$ 15.00                       | \$ 15.00                             |
| Total Sales Price Excl. GST                                                                 |                                                                                                                                          |     | \$440.60                       |                                |                                      |
| Total Sales Price Incl. GST                                                                 |                                                                                                                                          |     | \$ 484.66                      |                                |                                      |
