# Supplementary material for: Preventing Patient Falls Overnight Using Video Monitoring: A Clinical Evaluation
Source: MDPI journal article supplement (doi:10.3390/ijerph192113735), 2022-10-22
Supplement: s1 [file s1]

## Supplementary Material A: Video Monitoring Register

Ward \_\_\_\_\_ Date \_\_\_\_\_

| Patient Label | Bed No | Reason for Monitoring (Tick All That Apply)                                                                                                                                           | Record of Times Nurse Attended Patient after Being Alerted by Monitor                                                                                                                                          | Did You Take PVM on Patient Rounds |
|---------------|--------|---------------------------------------------------------------------------------------------------------------------------------------------------------------------------------------|----------------------------------------------------------------------------------------------------------------------------------------------------------------------------------------------------------------|------------------------------------|
|               |        | <input type="checkbox"/> Assessed as HFR using FRAT<br><input type="checkbox"/> Confused/not orientated<br><input type="checkbox"/> Impulsive<br><input type="checkbox"/> Other:..... | No: of times attended patient O/N: _____<br>Reason:<br><input type="checkbox"/> Toileting<br><input type="checkbox"/> Pain<br><input type="checkbox"/> Hunger/Thirst<br><input type="checkbox"/> Other : _____ | Yes/No                             |
|               |        | <input type="checkbox"/> Assessed as HFR using FRAT<br><input type="checkbox"/> Confused/not orientated<br><input type="checkbox"/> Impulsive<br><input type="checkbox"/> Other:..... | No: of times attended patient O/N: _____<br>Reason:<br><input type="checkbox"/> Toileting<br><input type="checkbox"/> Pain<br><input type="checkbox"/> Hunger/Thirst<br><input type="checkbox"/> Other : _____ | Yes/No                             |
|               |        | <input type="checkbox"/> Assessed as HFR using FRAT<br><input type="checkbox"/> Confused/not orientated<br><input type="checkbox"/> Impulsive<br><input type="checkbox"/> Other:..... | No: of times attended patient O/N: _____<br>Reason:<br><input type="checkbox"/> Toileting<br><input type="checkbox"/> Pain<br><input type="checkbox"/> Hunger/Thirst<br><input type="checkbox"/> Other : _____ | Yes/No                             |
|               |        | <input type="checkbox"/> Assessed as HFR using FRAT<br><input type="checkbox"/> Confused/not orientated<br><input type="checkbox"/> Impulsive<br><input type="checkbox"/> Other:..... | No: of times attended patient O/N: _____<br>Reason:<br><input type="checkbox"/> Toileting<br><input type="checkbox"/> Pain<br><input type="checkbox"/> Hunger/Thirst<br><input type="checkbox"/> Other : _____ | Yes/No                             |
|               |        | <input type="checkbox"/> Assessed as HFR using FRAT<br><input type="checkbox"/> Confused/not orientated<br><input type="checkbox"/> Impulsive<br><input type="checkbox"/> Other:..... | No: of times attended patient O/N: _____<br>Reason:<br><input type="checkbox"/> Toileting<br><input type="checkbox"/> Pain<br><input type="checkbox"/> Hunger/Thirst<br><input type="checkbox"/> Other : _____ | Yes/No                             |
