# Supplementary material for: Preventing Patient Falls Overnight Using Video Monitoring: A Clinical Evaluation
Source: Int J Environ Res Public Health. 2022 Oct 22;19(21):13735. doi: 10.3390/ijerph192113735 (PMC9657748; doi:10.3390/ijerph192113735)
Supplement: Supplementary file 1 [file ijerph-19-13735-s001.zip]

Archive with 5 entries (5 files):
- Supplementary Material A - Video Monitoring Register.pdf
- Supplementary Material B - Portable Video Monitoring Staff Survey REDCAP Database Register.pdf
- Supplementary Material C - Riskman Incident Reporting System Database.pdf
- Supplementary Material D - Portable Video Monitoring Overnight Staff Satisfaction Survey.pdf
- Supplementary Material E - Uniden Baby Monitor Costing.pdf
